# Supplementary material for: Comparison of Posttraumatic Stress Disorder Checklist Instruments From Diagnostic and Statistical Manual of Mental Disorders, Fourth Edition vs Fifth Edition in a Large Cohort of US Military Service Members and Veterans
Source: PubMed Central journal article supplement (PMC8080232; doi:10.1001/jamanetworkopen.2021.8072), 2021-04-27
Supplement: jamanetwopen-e218072-s001.pdf [file jamanetwopen-e218072-s001.pdf]

\*Indicates required information. Only first name, last name, and suffix will appear in PubMed.

| <b>*Group Name(s): Millennium Cohort Study team</b> |                   |                              |                  |             |                                          |                                                         |                                                                                            |
|-----------------------------------------------------|-------------------|------------------------------|------------------|-------------|------------------------------------------|---------------------------------------------------------|--------------------------------------------------------------------------------------------|
| <b>*First Name and Middle Initial(s)</b>            | <b>*Last Name</b> | <b>*Suffix (eg, Jr, III)</b> | Academic Degrees | Institution | Location (city, state/province, country) | Role or Contribution, eg, chair, principal investigator | Group (if more than 1 Group listed in the byline) and/or Subgroup (eg, Steering Committee) |
| Satbir K.                                           | Boparai           |                              | MBA              | NHRC        | San Diego, CA                            |                                                         |                                                                                            |
| Felicia R.                                          | Carey             |                              | PhD              | NHRC        | San Diego, CA                            |                                                         |                                                                                            |
| Sheila F.                                           | Castañeda         |                              | PhD              | NHRC        | San Diego, CA                            |                                                         |                                                                                            |
| Toni Rose T.                                        | Geronimo-Hara     |                              | MPH              | NHRC        | San Diego, CA                            |                                                         |                                                                                            |
| Isabel G.                                           | Jacobson          |                              | MPH              | NHRC        | San Diego, CA                            |                                                         |                                                                                            |
| Claire A.                                           | Kolaja            |                              | MPH              | NHRC        | San Diego, CA                            |                                                         |                                                                                            |
| Rayna K.                                            | Matsuno           |                              | PhD              | NHRC        | San Diego, CA                            |                                                         |                                                                                            |
| Deanne C.                                           | Millard           |                              | BA               | NHRC        | San Diego, CA                            |                                                         |                                                                                            |
| Anna C.                                             | Rivera            |                              | MPH              | NHRC        | San Diego, CA                            |                                                         |                                                                                            |
| Beverly D.                                          | Sheppard          |                              | BS               | NHRC        | San Diego, CA                            |                                                         |                                                                                            |
| Daniel W.                                           | Trone             |                              | PhD              | NHRC        | San Diego, CA                            |                                                         |                                                                                            |
| Jennifer L.                                         | Walstrom          |                              |                  | NHRC        | San Diego, CA                            |                                                         |                                                                                            |
